# Supplementary material
Source: PubMed Central journal article supplement (PMC5586366)
Supplement: 115FileS1.pdf [file 115FileS1.pdf]

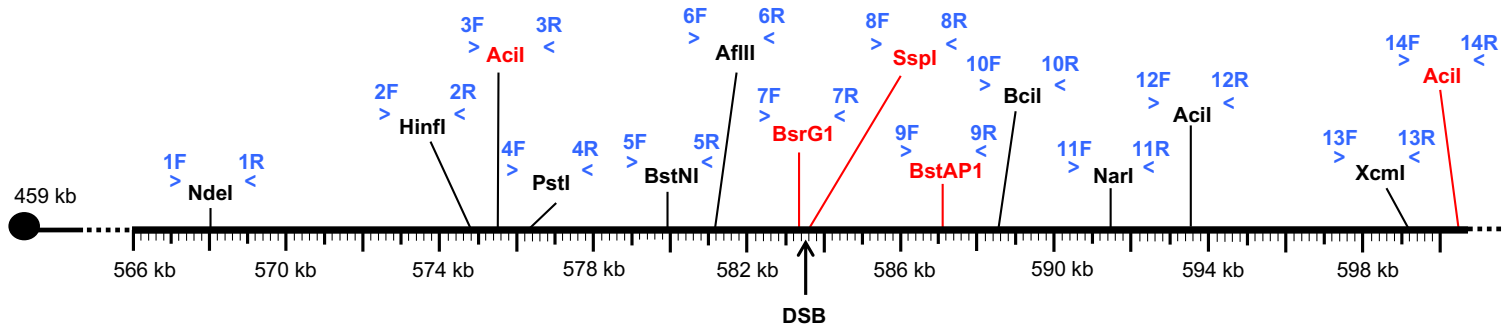

**Figure S1. Primers pairs and restriction sites used to diagnose genetic linkages in spores.** The right arm of chromosome IV is shown, with SGD coordinates indicated. Primer pairs are numbered and are in blue. The W303- or YJM-specific restriction site within each corresponding PCR fragment is in red or black, respectively. The position of the initiating DSB is indicated.

## One broken chromatid

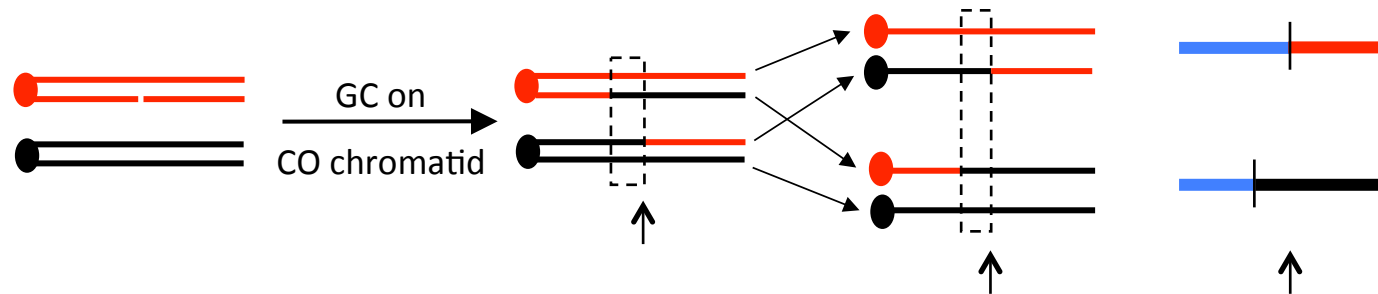

## Two broken chromatids

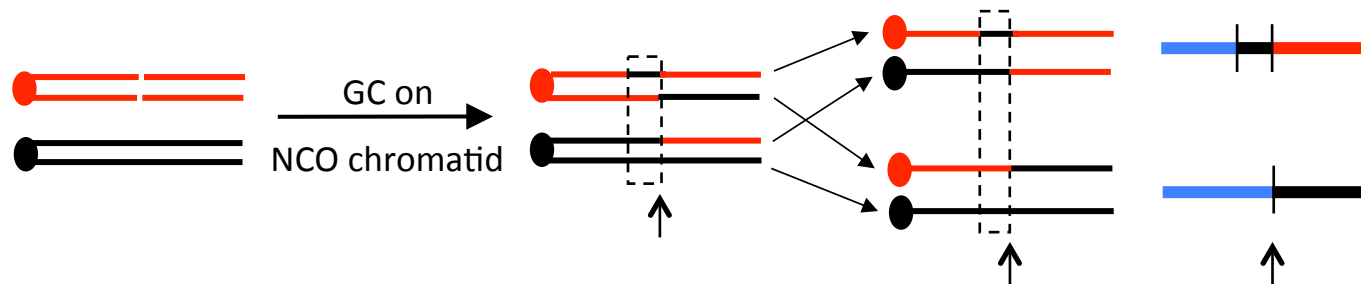

**Figure S2. GC pattern when there are one versus two broken chromatids.** Red and black lines correspond to W303- and YJM-specific chromosomal segments, respectively; red and black circles represent W303 and YJM centromeres, respectively. Vertical arrows indicate the DSB positions. When only one chromatid is broken (top panel) the GC tract is always located on the CO chromatid with the W303 centromere. In the abbreviated red/black/blue depiction (blue indicates heterozygosity), there is a single transition between heterozygosity and homozygosity in each sector (blue to red and blue to black in the red and white sectors, respectively). When both chromatids are broken and repaired, however, the GC tract can be on the NCO, W303 chromatid instead of on the CO chromatid (lower panel). The segregation of the GC-containing, NCO chromatid with a CO chromatid leads to two transitions (blue to black to red) in the red sector.

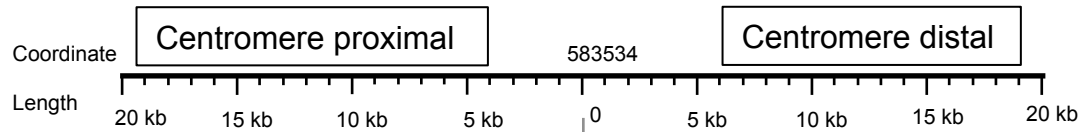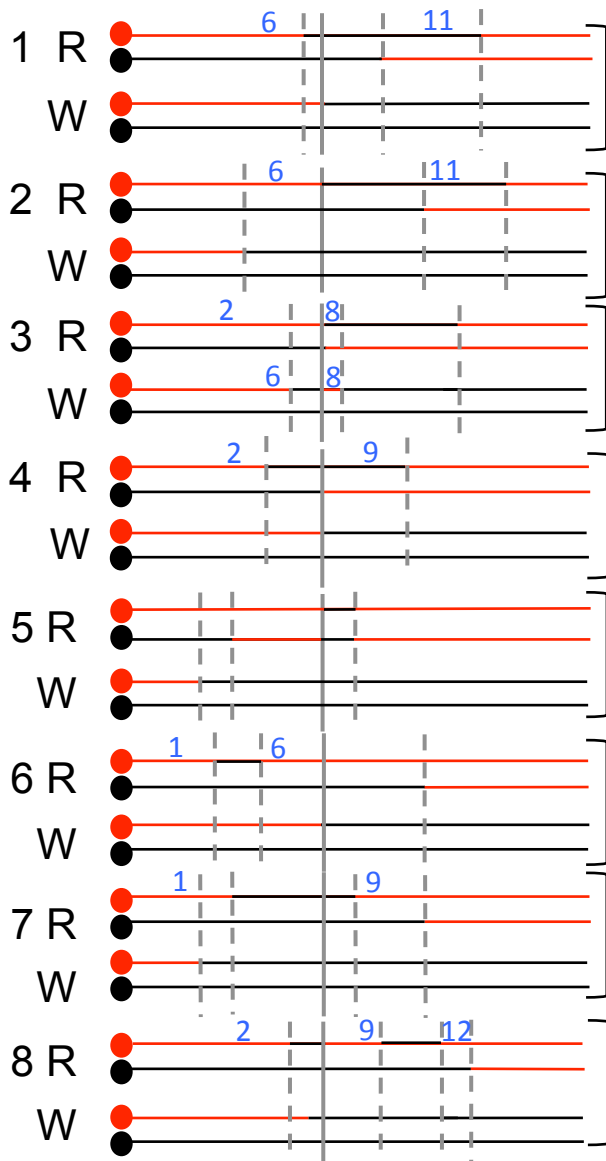

NCO: 13.006 kb  
CO left: -  
CO right: 3.976 kb

NCO: 17.047 kb  
CO left: 6.136 kb  
CO right: 6.624 kb

NCO: 11.234 kb  
CO left: 1.251 kb  
CO right: -

NCO: 9.758 kb  
CO left: -  
CO right: -

NCO: 1.118 kb  
CO left: 10.330 kb  
CO right: 1.118 kb

NCO: 9.245 kb  
CO left: -  
CO right: 6.758 kb

NCO: 10.464 kb  
CO left: 10.245 kb  
CO right: 6.250 kb

NCO: 11.790 kb  
CO left: 0.977 kb  
CO right: 11.979 kb

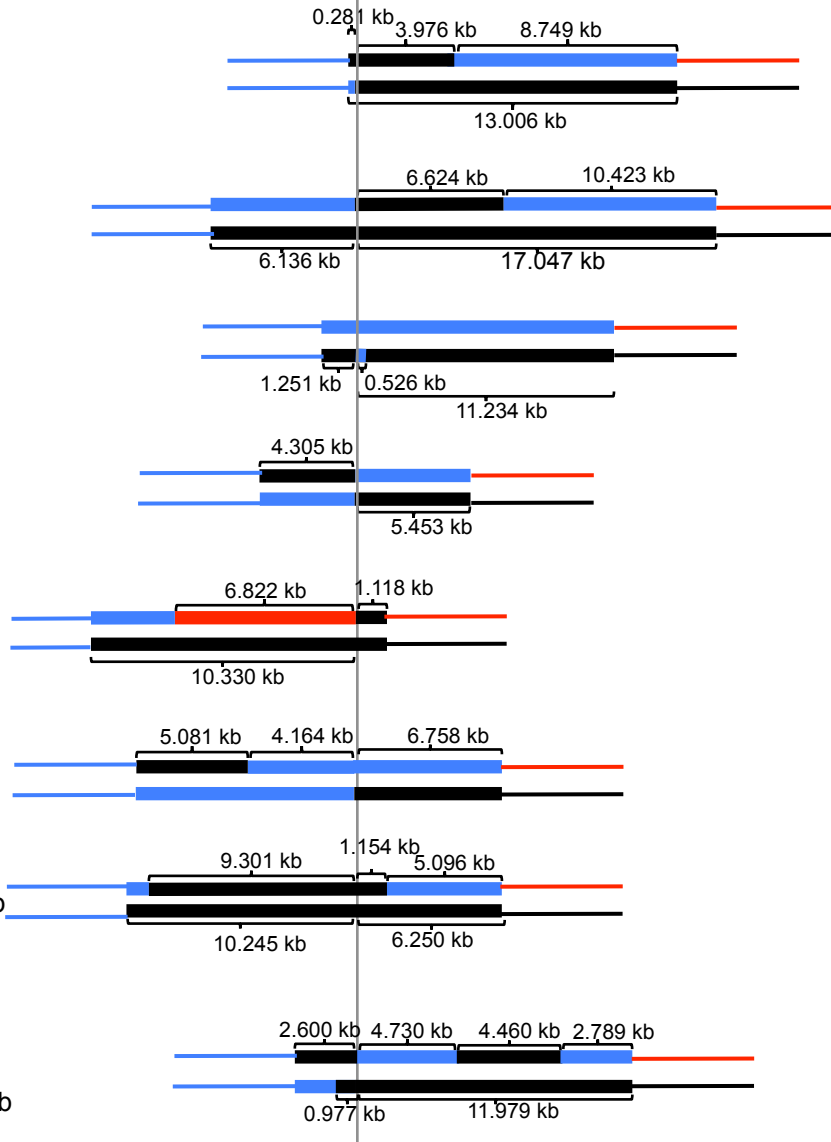

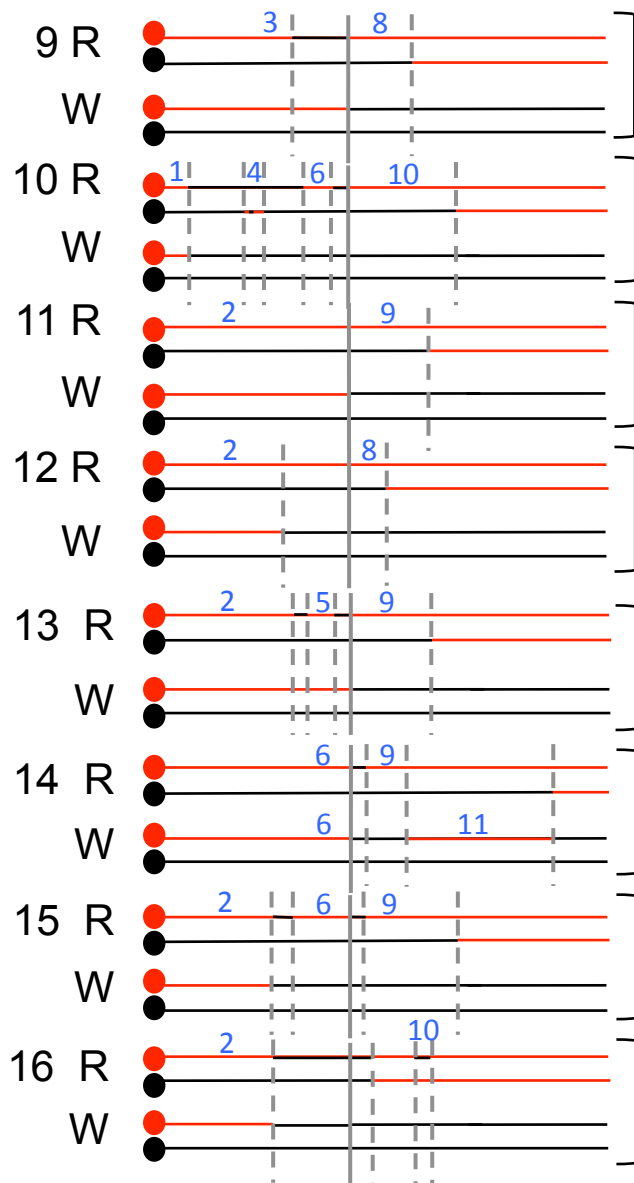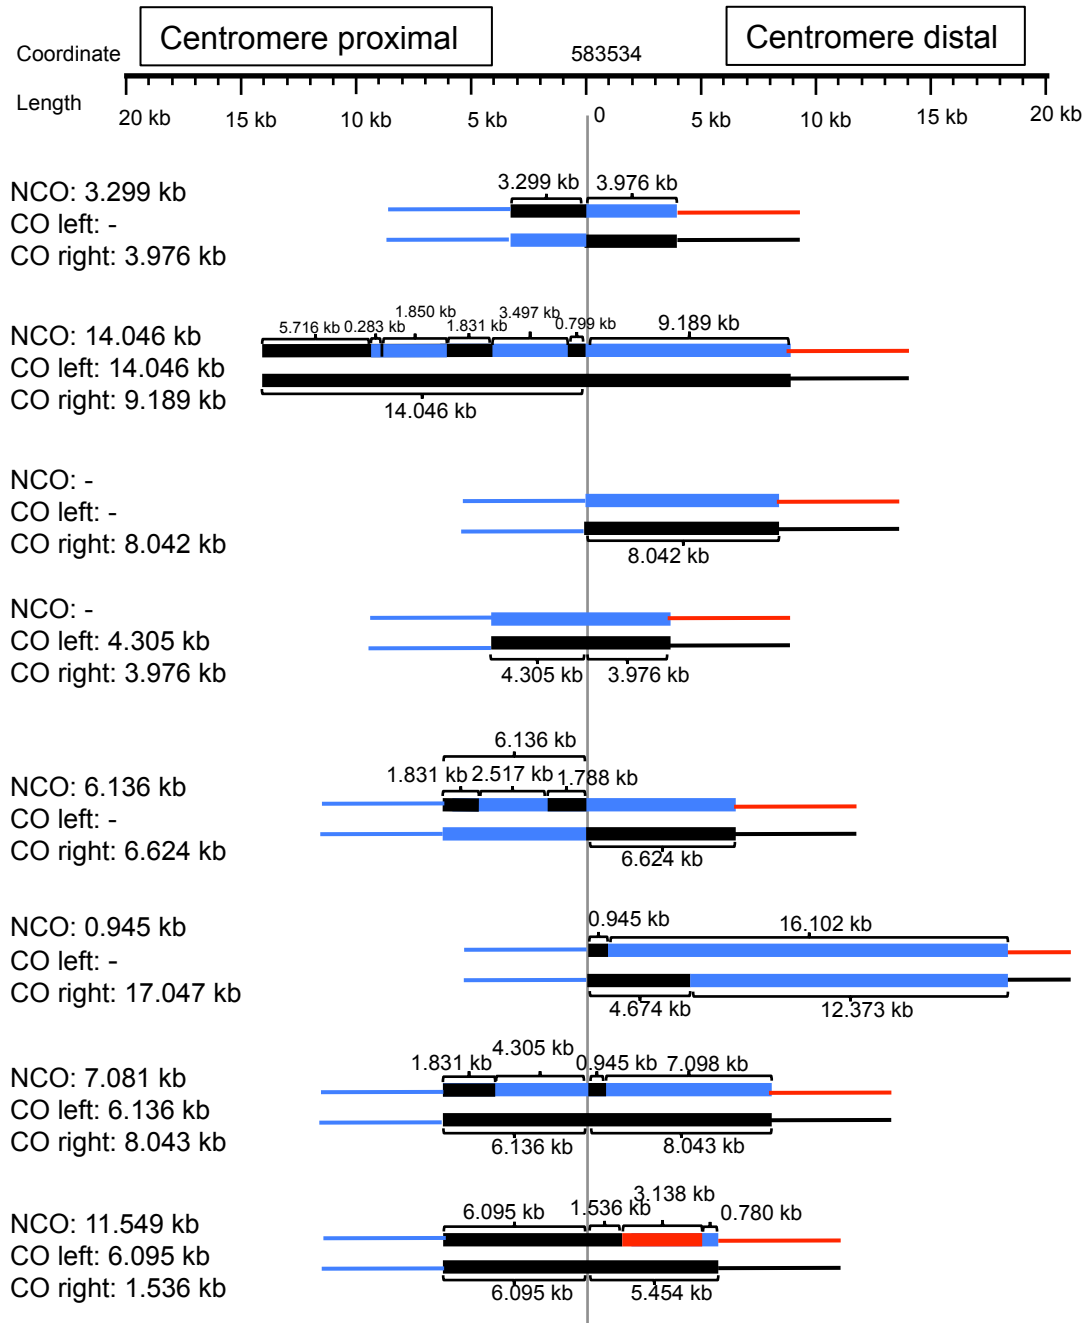

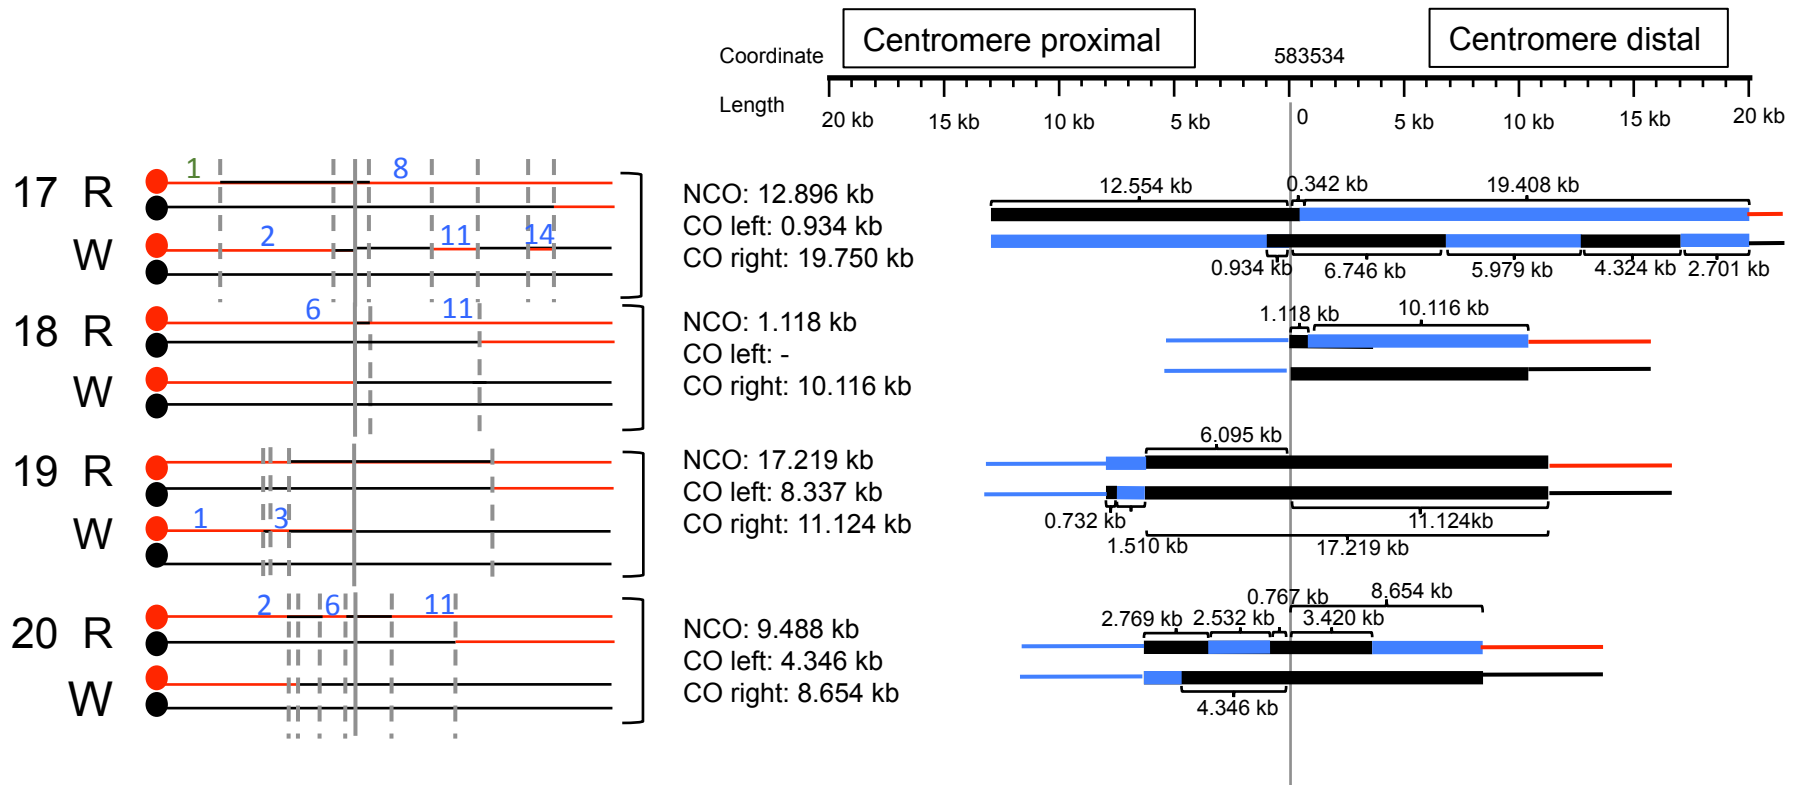

**Figure S3. Chromosomes present in each sectored colony.** The four chromosomes present within each sectored colony are diagrammed on the left. Red and black lines correspond to W303- and YJM-specific chromosomal segments, respectively, in CO and NCO products; red and black circles represent W303 and YJM centromeres, respectively. Solid gray vertical lines mark the position of the initiating DSB and dotted lines mark transitions between heterozygosity and homozygosity. Blue numbers correspond to primer pairs used to diagnose genetic linkages on the CO and NCO chromosomes within specific sectors (see Tables S2 and S3). On the right, the shorthand depiction is presented as in Figure 4, but 4:0 and 3:1 tract lengths are given and are presented to scale.

Wild-type conversion tract (N=119)

*mlh1* $\Delta$  hetDNA tract (N=108)

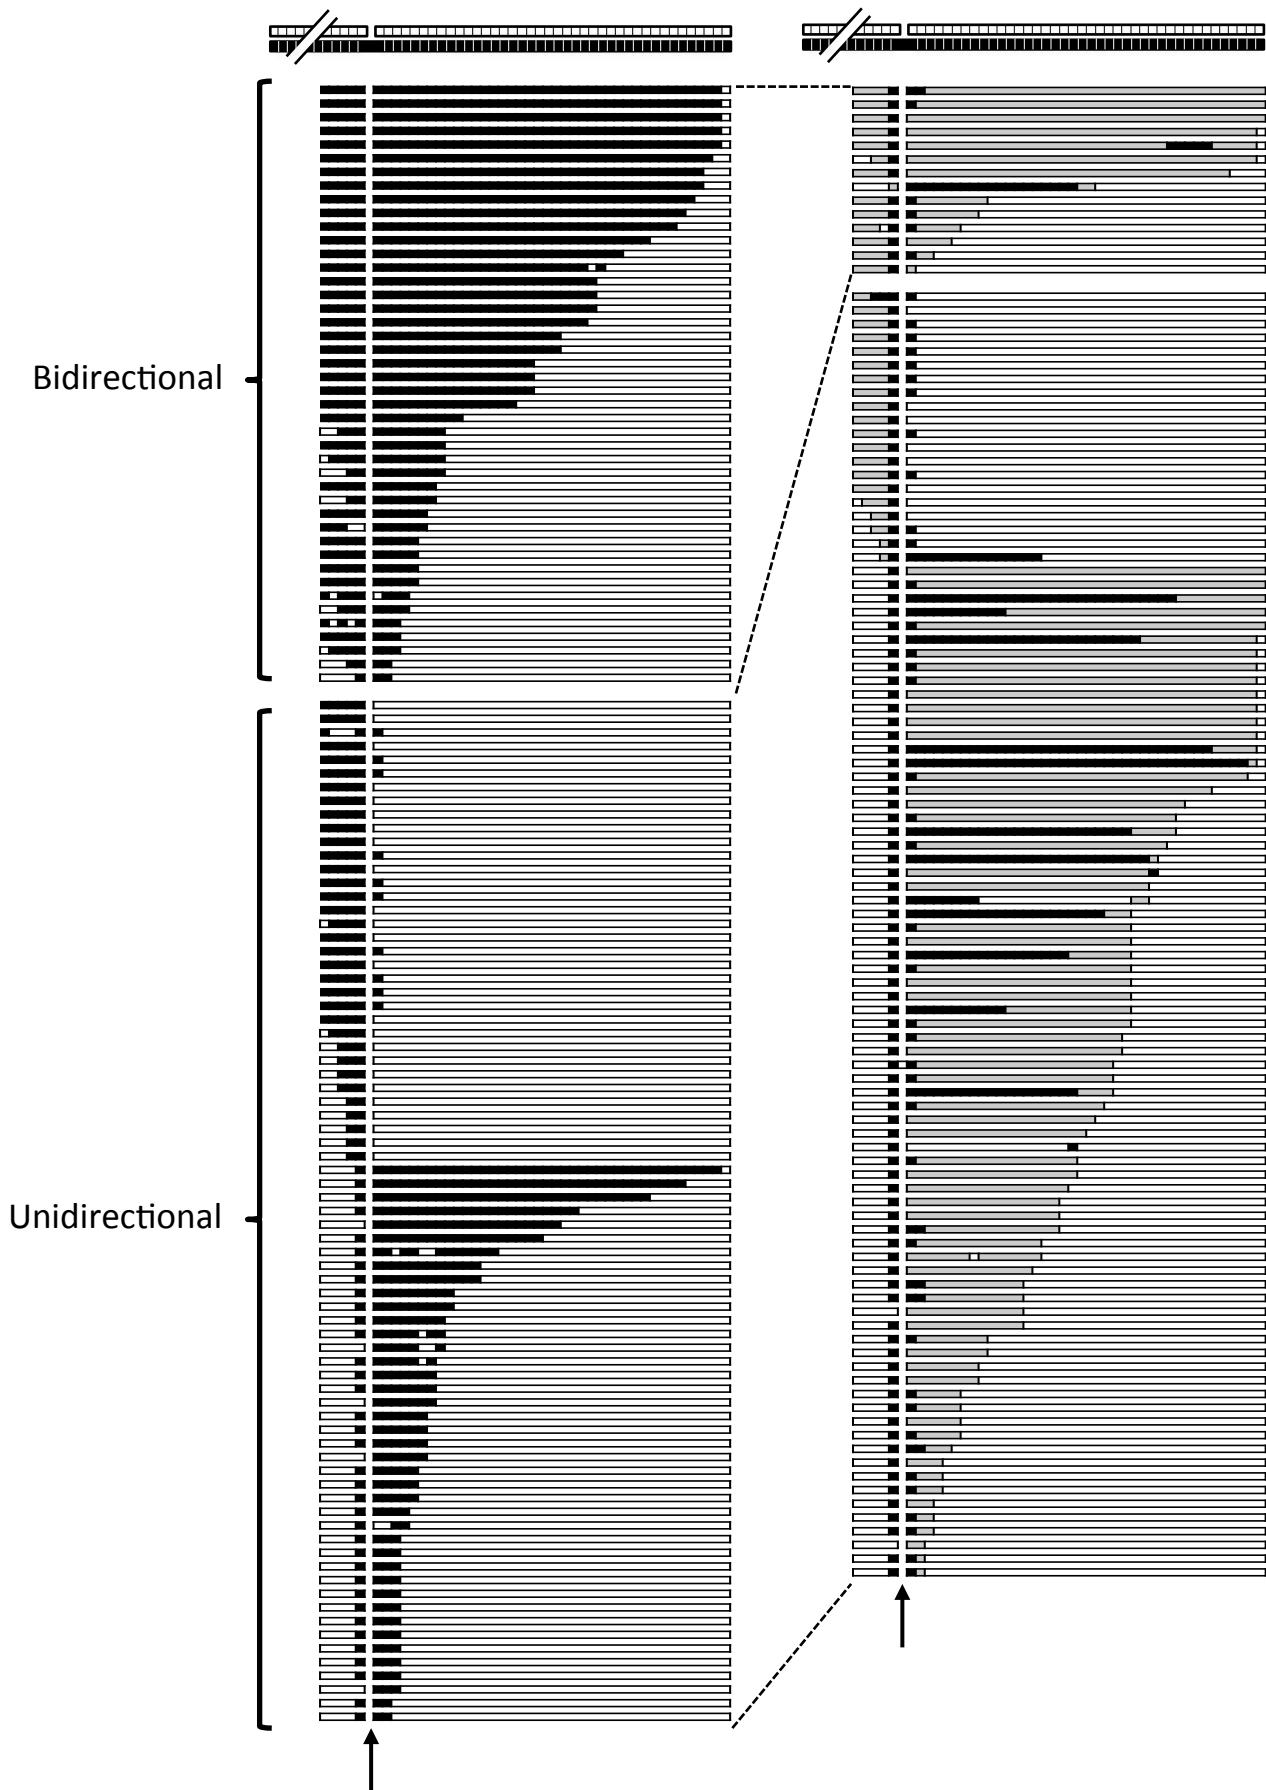

**Figure S4. Contribution of MMR to NCO tract directionality in the ectopic system.** The ectopic system shown in Figure 7A was used to map GC and hetDNA tracts in wild-type (adopted from Guo *et al.* 2017) and *mlh1* $\Delta$  strains, respectively. Each line represents an individual NCO event; white and black boxes represent recipient and donor SNPs, respectively, which were spaced at ~50 bp intervals. Grey boxes indicate hetDNA and vertical arrows mark the DSB position. Following the selection of Lys<sup>+</sup> recombinants, DNA was isolated from entire colonies without purification in order to preserve mismatches present in hetDNA intermediates. NCO tracts were truncated at the 5' end during PCR-amplification (only 5 upstream SNPs are represented) with barcoded primers. PCR fragments were pooled for SMRT sequencing and individual recombinants were then sorted by barcode. Conversion of first SNP adjacent to the DSB (8-nt from each of the I-SceI generated 3' ends) has been shown to be due to proofreading activity of DNA polymerase  $\delta$  (Guo *et al.* 2017) and was disregarded when determining tract directionality. For example, a tract with a long conversion tract (black box) upstream of DSB and a conversion tract covering only the first SNP downstream of DSB is considered a unidirectional tract.

**Table S1: Yeast strains**

| <b>Strain</b>         | <b>Relevant genotype</b>                                                                                        | <b>Comments/reference</b>                                                         |
|-----------------------|-----------------------------------------------------------------------------------------------------------------|-----------------------------------------------------------------------------------|
| JSC12-1<br>(W3031A)   | <i>MATa RAD5 ade2-1 leu2-3,112 his3-11,15 ura3-1 trp1-1 can1-100Δ::nat IV1510386::kanMX-can1-100</i>            | Isogenic derivative of W303-1A                                                    |
| JSC21-1<br>(YJM789)   | <i>MATα ade2-1 ura3 gal2 ho:hisG canΔ::NAT IV1510386::SUP4-o</i>                                                | Isogenic derivative of YJM789                                                     |
| SJR4246<br>(W303)     | <i>IV1510386::kanMX IV583526:CORE-UH</i>                                                                        | CORE-UH cassette inserted between the <i>OCA6</i> and <i>DOS2</i> loci of JSC12-1 |
| SJR4248<br>(YJM)      | <i>IV1510386::SUP4-o IV583526:CORE-UH</i>                                                                       | CORE-UH cassette inserted between the <i>OCA6</i> and <i>DOS2</i> loci of JSC21-1 |
| SJR4250<br>(W303)     | <i>IV1510386::kanMX IV583534:I-SceI</i>                                                                         | CORE-UH of SJR4246 replaced with 18 bp I-SceI cut site                            |
| SJR4252<br>(YJM)      | <i>IV1510386::SUP4-o IV583534:I-SceI<sup>nc</sup></i>                                                           | CORE-UH of SJR4248 replaced with 22 bp mutant (non-cutting, nc) I-SceI site       |
| SJR4313<br>(W303/YJM) | <i>MATa/MATα IV1510386::kanMX/SUP4-o IV583534:I-SceI/I-SceI<sup>nc</sup></i>                                    | SJR4250 x SJR 4252                                                                |
| SJR4315<br>(W303/YJM) | <i>MATa/matαΔ::URA3 IV1510386::kanMX/SUP4-o IV583534:I-SceI/I-SceI<sup>nc</sup></i>                             | <i>MATα</i> locus of SJR4313 replaced with <i>URA3</i> to prevent sporulation.    |
| SJR4317<br>(W303/YJM) | <i>MATa/matαΔ::URA3 IV1510386::kanMX/SUP4-o IV583534:I-SceI/I-SceI<sup>nc</sup> his3Δ::pGAL-I-SceI-hph/HIS3</i> | <i>his3-11,15</i> replaced with a <i>pGAL-I-SceI</i> fusion                       |



**Table S2. Primers and restriction site polymorphisms used to map GC tracts**

| Primer<br>(Fig S1) | Primer name          | Sequence (5' > 3')                                      | Restriction<br>Site | Restriction site presence (+)<br>or absence (-) |         |
|--------------------|----------------------|---------------------------------------------------------|---------------------|-------------------------------------------------|---------|
|                    |                      |                                                         |                     | W303                                            | YJM     |
| 1 F<br>R           | U567959F<br>U568803R | CACCAACAGGTGTAGGCTCA<br>TTTGCCATGGTTTATCAGGA            | <i>NdeI</i>         | -                                               | +       |
| 2 F<br>R           | U574454F<br>D574454R | TCCAATCGTCATTGTTTTGA<br>ACTATCGGCGTCTTTGTCCA            | <i>HinfI</i>        | -                                               | +       |
| 3 F<br>R           | U574954F<br>D576563R | CGGTATATTGTTTGAAGGCC<br>TCATACCTAAGAAGTCGTGAACAT        | <i>AcI</i>          | 3 sites                                         | 2 sites |
| 4 F<br>R           | U575934F<br>D576563R | GCCCATTACTTAAGGCTCATATC<br>TCATACCTAAGAAGTCGTGAACAT     | <i>PstI</i>         | -                                               | +       |
| 5 F<br>R           | U579186F<br>D579742R | TTGAAGAATTGAGGGAGCAA<br>GAACCAAGCTGGAGCATTTC            | <i>BstNI</i>        | -                                               | +       |
| 6 F<br>R           | U581508F<br>D582114R | GGCCATTTGGGAGGAATATC<br>TTTGCGAAAATGAGCAGACA            | <i>AflII</i>        | -                                               | +       |
| 7 F<br>R           | OCA6F<br>DOS2R       | CGCATCGTACTACAACATCGTATTC<br>CATCTTCGATACAAGCTACTTGTTTC | <i>BsrGI</i>        | +                                               | -       |
| 8 F<br>R           | OCA6F<br>DOS2+576R   | CGCATCGTACTACAACATCGTATTC<br>TGTCGCCCTGTAAAATAGAACA     | <i>SspI</i>         | +                                               | -       |
| 9 F<br>R           | U587100F<br>D587100R | CATGATCATTGTCTGATTGCTG<br>GCAAAAATAAGGGTGCAATGA         | <i>BstAPI</i>       | +                                               |         |
| 10 F<br>R          | U588496F<br>D588694R | GTCTTGGAGTGCGCAAAAA<br>TGCTCACGAGCCATTGATAC             | <i>BclI</i>         | -                                               | +       |
| 11 F<br>R          | D591116F<br>U592210R | CAAACCTTGCTATGAATGTCAGGTC<br>TGTTGGCTTGAGAAACGTCA       | <i>NarI</i>         | -                                               | +       |
| 12 F<br>R          | D593108F<br>D594201R | TCGTCGCAGTAAGCATTGTC<br>CGTTCGGTTCTTGTTATTTTCG          | <i>AcI</i>          | 1 site                                          | 2 sites |
| 13 F<br>R          | D598460F<br>D599224R | GGCAAGGTCGATCTACGAAA<br>AGTTACGATCGTCGCTGCTT            | <i>XcmI</i>         | -                                               | +       |
| 14 F<br>R          | U601761F<br>D602336R | GGGCACTACCACAAAGAAA<br>TATCGCACACTGGTTCTGCT             | <i>AcI</i>          | 2 sites                                         | 1 site  |

**Table S3. Linkage relationships on CO and NCO chromosomes in the same sector**

| Sector           | Primer pairs | # P spores | # NP spores | Linkage |
|------------------|--------------|------------|-------------|---------|
| 1R               | 6 and 11     | 2          | 49          | NP      |
| 2R               | 6 and 11     | 2          | 40          | NP      |
| 3R               | 2 and 8      | 0          | 53          | NP      |
| 3W               | 6 and 8      | 22         | 0           | P       |
| 4R               | 2 and 9      | 0          | 35          | NP      |
| 6R               | 1 and 6      | 47         | 0           | P       |
| 7R               | 1 and 9      | 24         | 2           | P       |
| 8R <sup>1</sup>  | 2 and 9      | 49         | 3           | P       |
|                  | 2 and 12     | 49         | 3           | P       |
| 9R               | 3 and 8      | 32         | 0           | P       |
| 10R <sup>2</sup> | 1 and 4      | 0          | 33          | NP      |
|                  | 1 and 6      | 33         | 0           | P       |
|                  | 1 and 10     | 30         | 3           | P       |
| 11R              | 2 and 9      | 23         | 4           | P       |
| 12R              | 2 and 8      | 36         | 0           | P       |
| 13R              | 2 and 5      | 16         | 0           | P       |
|                  | 2 and 9      | 16         | 0           | P       |
| 14R              | 6 and 9      | 45         | 1           | P       |
| 14W              | 6 and 11     | 22         | 2           | P       |
| 15R              | 2 and 6      | 24         | 0           | P       |
|                  | 2 and 9      | 24         | 0           | P       |
| 16R              | 2 and 10     | 1          | 23          | NP      |
| 17R              | 1 and 8      | 28         | 0           | P       |
| 17W              | 2 and 11     | 24         | 0           | P       |
|                  | 2 and 14     | 24         | 0           | P       |
| 18R              | 6 and 11     | 29         | 0           | P       |
| 19W              | 1 and 3      | 46         | 0           | P       |
| 20R              | 2 and 6      | 32         | 0           | P       |
|                  | 2 and 11     | 32         | 0           | P       |

Parental (P) refers to a W303-W303 or YJM-YJM relationship between the amplified fragments. In non-parental (NP) spores, there is a W303-YJM linkage between fragments. Primer pairs used to amplify fragments are given in Table S2 and their positions are shown in Figure S1.

<sup>1</sup>Fragment produced with primer pair 12 was sequenced to confirm transition point

<sup>2</sup>Single SNP at coordinate 575520 is homozygous
